# Supplementary material for: Synthesis and characterization of a trans-1 hexakis-fullerene linker that forms crystalline polymers with silver salts
Source: Royal Society of Chemistry journal article supplement (doi:10.1039/c5dt03054d), 2015-01-01
Supplement: c5dt03054d1.pdf [file c5dt03054d1.pdf]

## Supporting Information

# Synthesis and Characterization of a *trans*-1 Hexakis- fullerene Linker that Forms Crystalline Polymers with Silver Salts.

Chia-Hsiang Chen,<sup>a</sup> Amineh Aghabali,<sup>b</sup> Alejandro J. Metta-Magana,<sup>a</sup>  
Marilyn M. Olmstead,\*<sup>b</sup> Alan L. Balch\*<sup>b</sup> and Luis Echegoyen\*<sup>a</sup>

<sup>a</sup> Department of Chemistry, University of Texas at El Paso, El Paso, TX 79968, USA.

<sup>b</sup> Department of Chemistry, University of California, Davis, CA 95616, USA.

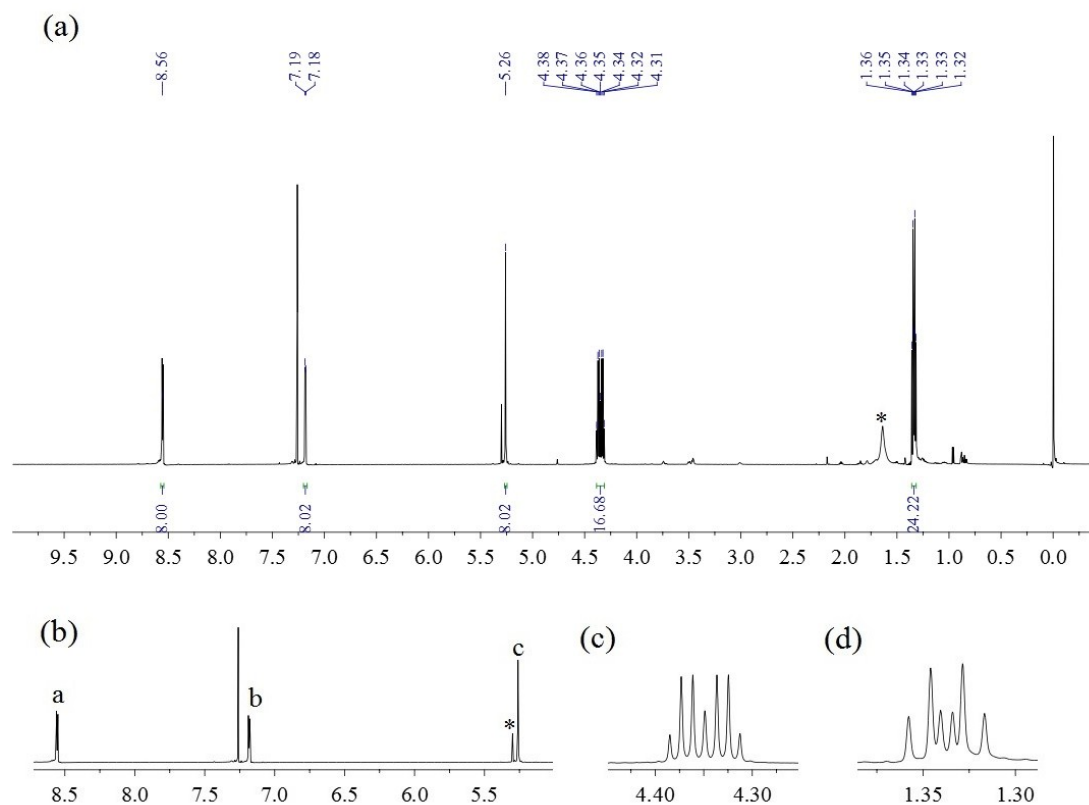

Figure S1. (a)  $^1\text{H}$  NMR spectrum of compound **3** (600 MHz,  $\text{CDCl}_3$ ) and expanded parts: (b) 8.55–5.00 ppm, (c) 4.45–4.25 ppm, (d) 1.40–1.20 ppm. \* represent solvent peak.

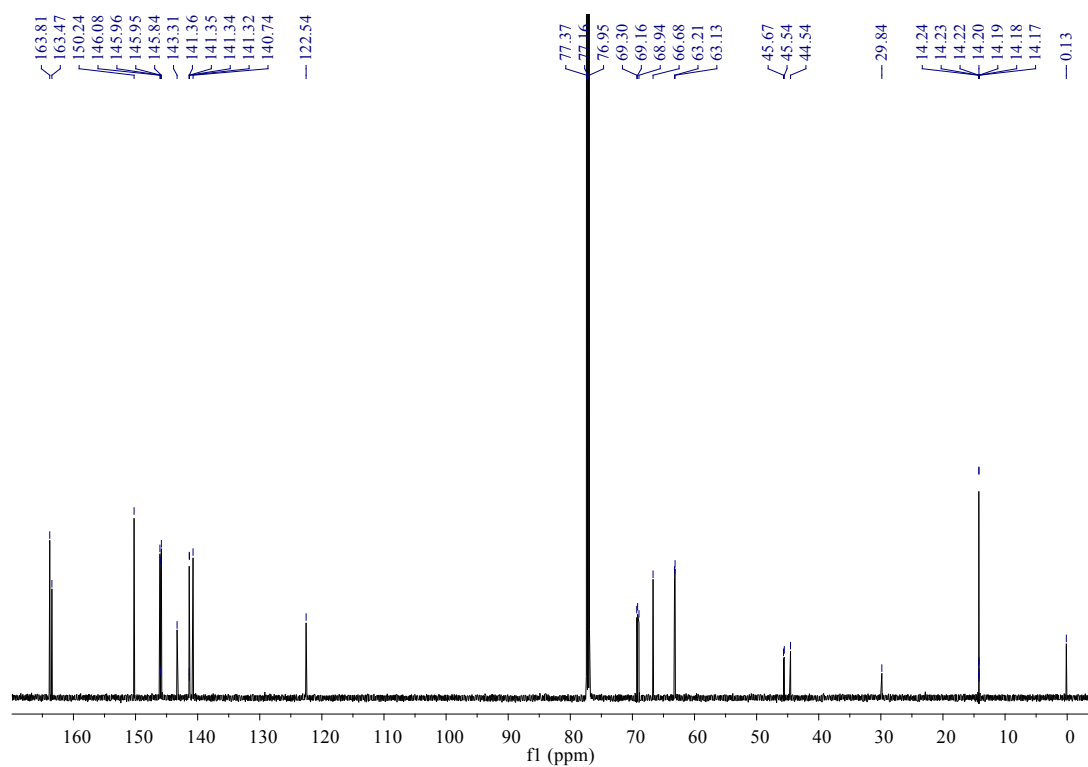

Figure. S2  $^{13}\text{C}$  NMR spectrum of compound **3** (150 MHz,  $\text{CDCl}_3$ )

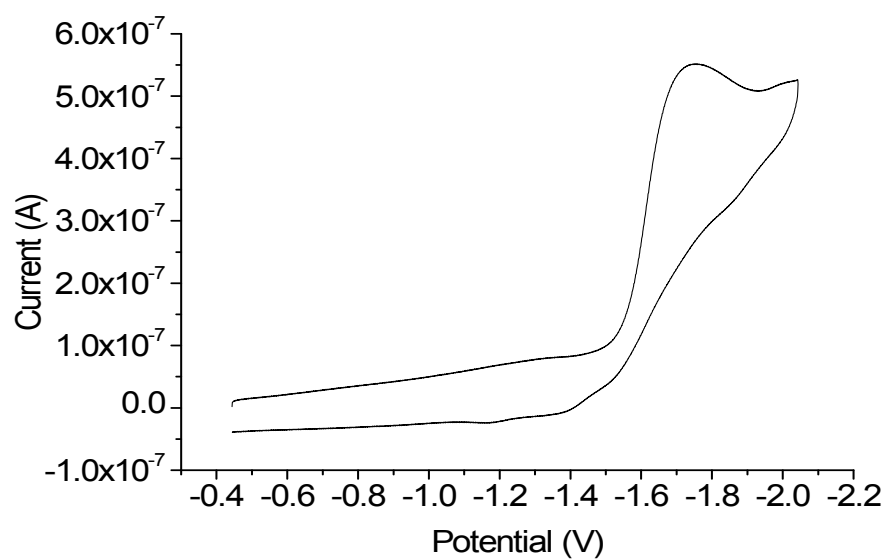

Figure S3. Cyclic voltammogram for **3** in dichloromethane. The potential was scanned at  $100\text{ mV s}^{-1}$  at  $25\text{ }^\circ\text{C}$ . The potentials are vs. the  $\text{Fc}/\text{Fc}^+$  couple.

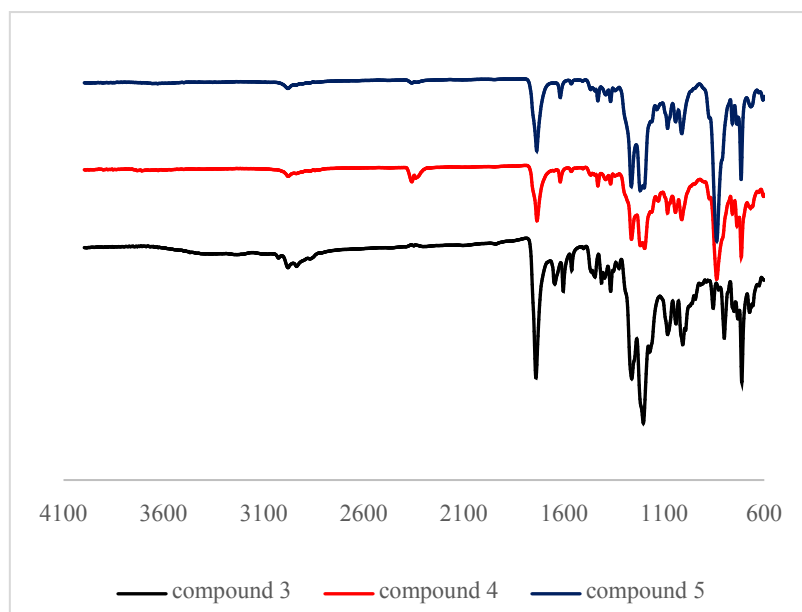

Figure S4. FT-IR (ATR) spectra of compound **3**, **4** and **5**

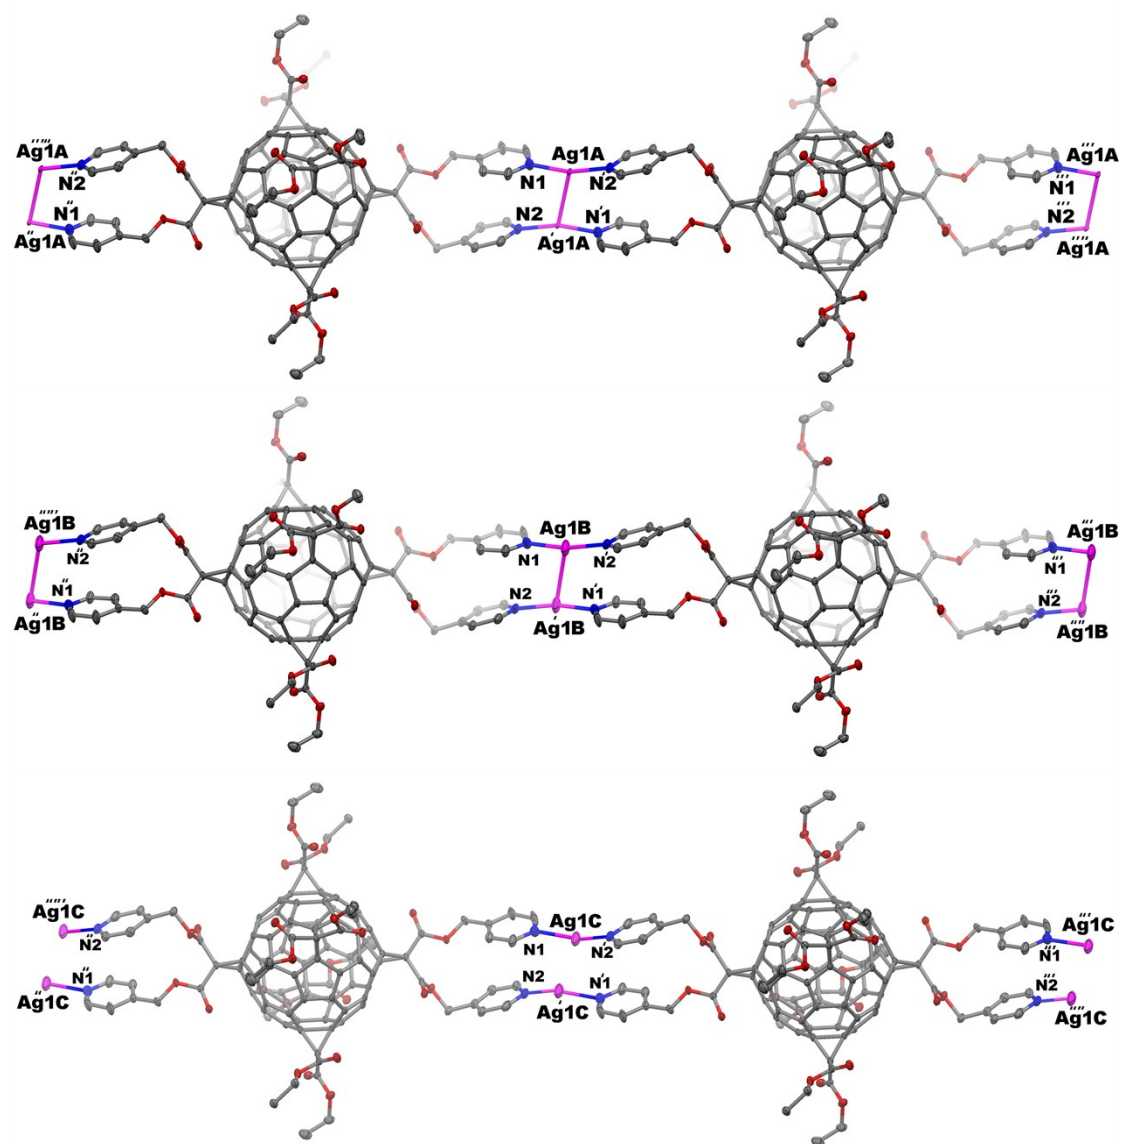

Figure S5. Drawings of **4** with 30% thermal ellipsoids. Bottom, with Ag1A with 0.40 partial occupancy; middle, with Ag1B with 0.40 partial occupancy; top, with Ag1C with 0.20 partial occupancy. Color code: carbon atoms, gray ellipsoids; oxygen atoms, red ellipsoids; nitrogen atoms, blue ellipsoids; silver ions, violet ellipsoids. For clarity, the anions and solvate molecules are not shown.

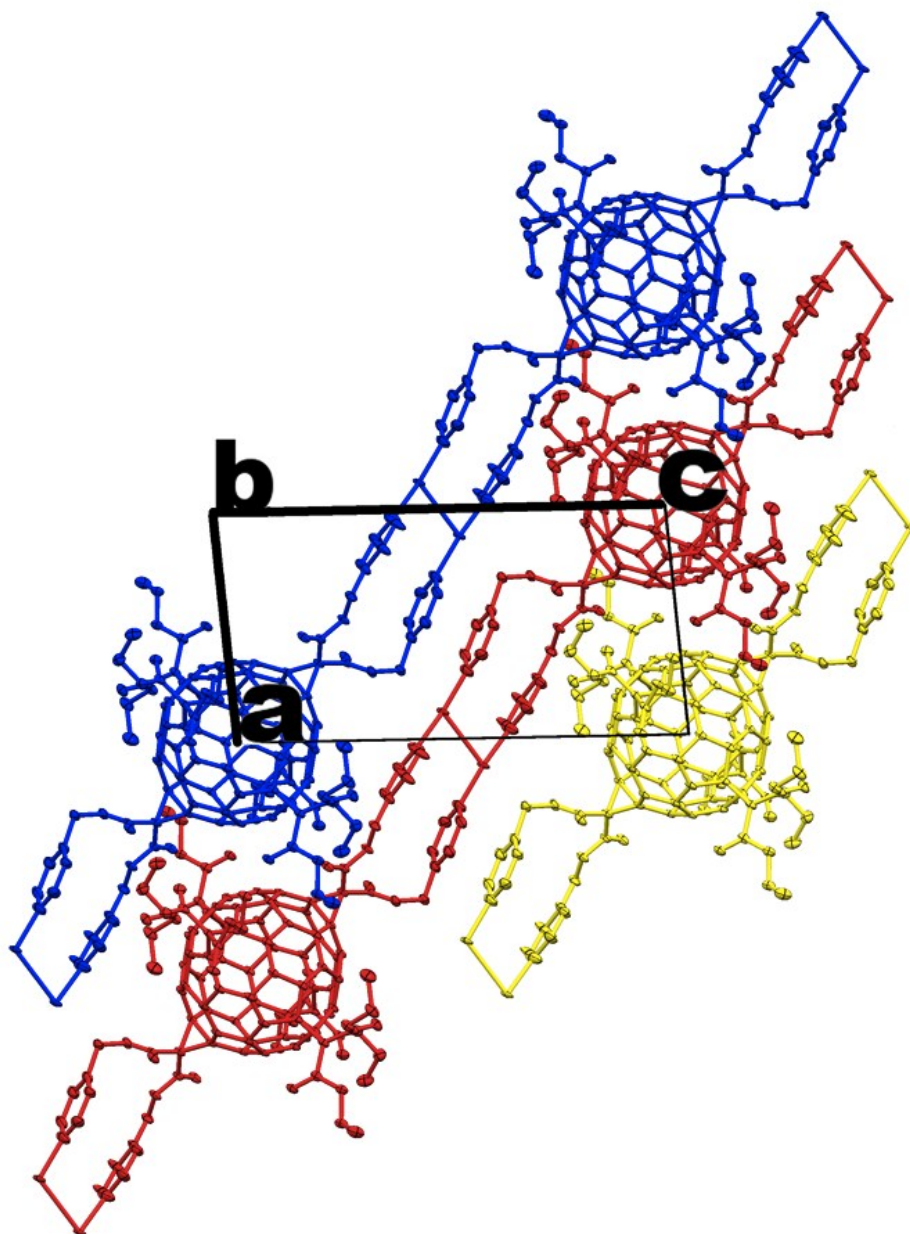

Figure S6. Molecular packing for **4**. Different polymeric strands are colored blue, red, yellow. For clarity, the anions and solvate molecules are not shown.

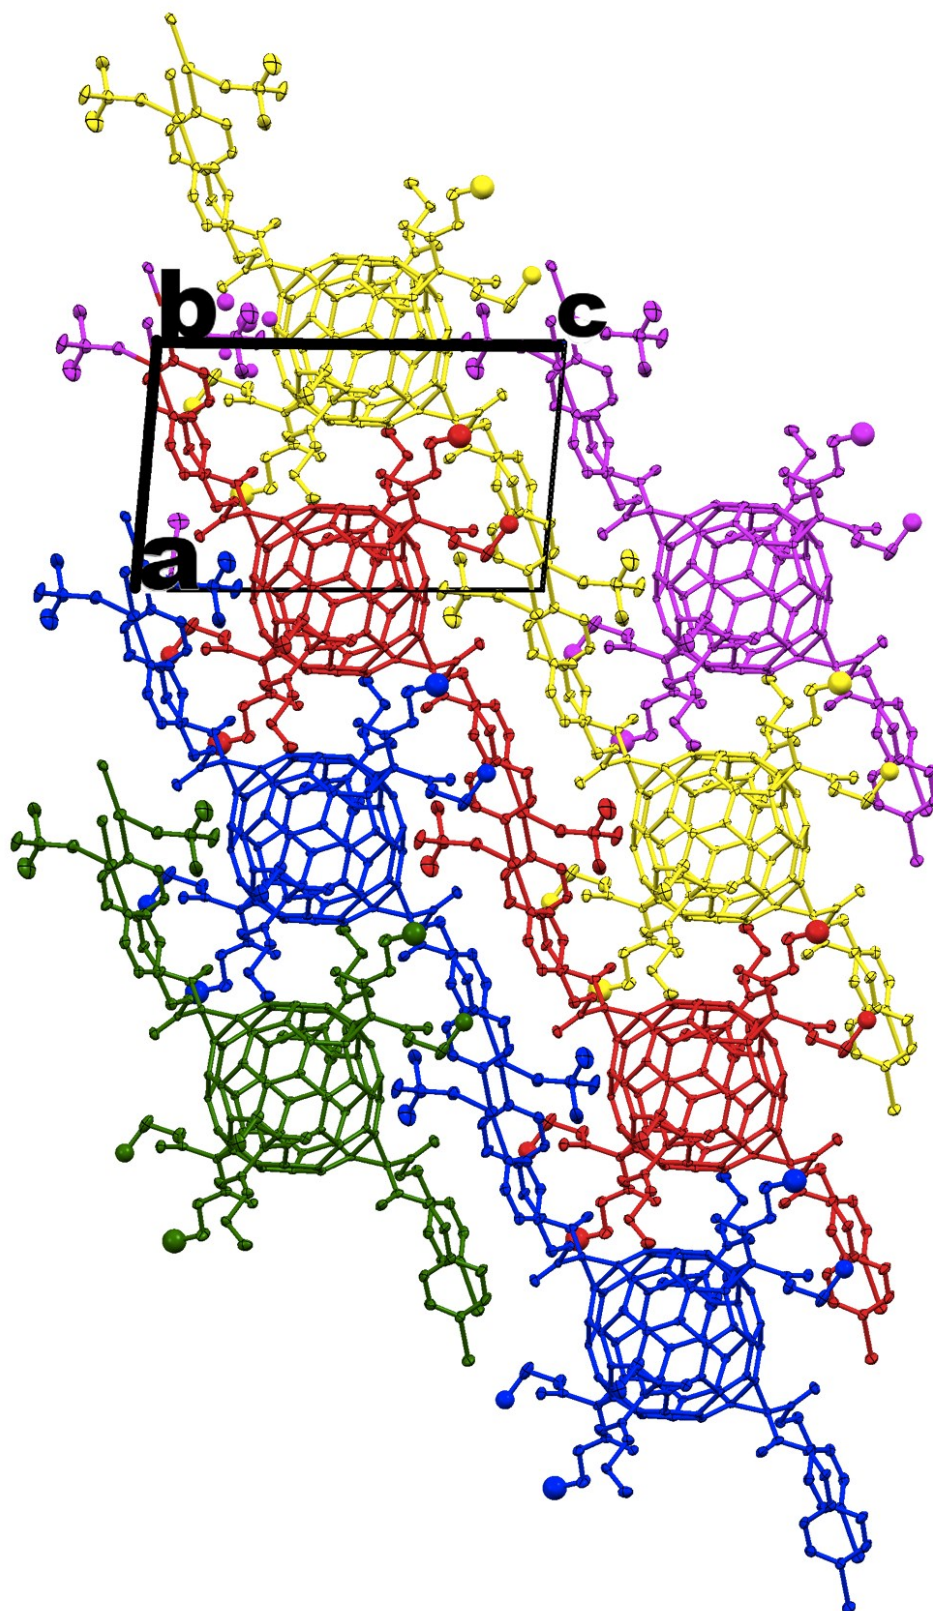

Figure S7. Molecular packing for **5**. Different polymeric strands are colored green, blue, red, yellow, violet. For clarity, the anions and solvate molecules are not shown.
